# Supplementary material for: Design and synthesis of mixed-ligand architectured Zn-based coordination polymers for energy storage
Source: Royal Society of Chemistry journal article supplement (doi:10.1039/d3dt00518f), 2023-01-01
Supplement: d3dt00518f1.pdf [file d3dt00518f1.pdf]

**Electronic Supplementary Information for**  
**Design and Synthesis of Mixed-Ligand Architected Zn-based Coordination**  
**Polymers for Energy Storage**

Tapan Kumar Ghosh and G Ranga Rao\*

Department of Chemistry and DST-Solar Energy Harnessing Centre (DSEHC), Indian Institute of  
Technology Madras, Chennai-600036, India

---

\*Corresponding author; E-mail: [grrao@iitm.ac.in](mailto:grrao@iitm.ac.in)

**Table S1** Crystallographic data and structure refinement parameters of Zn-CP

|                                                                                                                                                                                                            |                                                                   |
|------------------------------------------------------------------------------------------------------------------------------------------------------------------------------------------------------------|-------------------------------------------------------------------|
| Identification code                                                                                                                                                                                        | Zn-CP (NIZN)                                                      |
| Empirical formula                                                                                                                                                                                          | C <sub>19</sub> H <sub>20</sub> N <sub>2</sub> O <sub>10</sub> Zn |
| Formula weight                                                                                                                                                                                             | 501.74                                                            |
| Temperature                                                                                                                                                                                                | 296(2) K                                                          |
| Crystal system                                                                                                                                                                                             | Monoclinic                                                        |
| Space group                                                                                                                                                                                                | C2/c                                                              |
| <i>a</i> (Å)                                                                                                                                                                                               | 7.87050(10)                                                       |
| <i>b</i> (Å)                                                                                                                                                                                               | 17.3418(3)                                                        |
| <i>c</i> (Å)                                                                                                                                                                                               | 32.3764(5)                                                        |
| <i>α</i> (deg)                                                                                                                                                                                             | 90                                                                |
| <i>β</i> (deg)                                                                                                                                                                                             | 92.492(4)                                                         |
| <i>γ</i> (deg)                                                                                                                                                                                             | 90                                                                |
| Wavelength (Å)                                                                                                                                                                                             | 0.71073                                                           |
| Volume (Å <sup>3</sup> )                                                                                                                                                                                   | 4414.83(12)                                                       |
| <i>Z</i>                                                                                                                                                                                                   | 8                                                                 |
| $\rho_{\text{calcd}}$ (mg m <sup>-3</sup> )                                                                                                                                                                | 1.510                                                             |
| $\mu$ (mm <sup>-1</sup> )                                                                                                                                                                                  | 1.170                                                             |
| <i>F</i> (000)                                                                                                                                                                                             | 2064                                                              |
| Crystal size (mm <sup>3</sup> )                                                                                                                                                                            | 0.200 × 0.180 × 0.150                                             |
| $\theta$ range for data collection (deg)                                                                                                                                                                   | 2.844 to 24.998°                                                  |
| Index ranges                                                                                                                                                                                               | -9 ≤ <i>h</i> ≤ 9, -20 ≤ <i>k</i> ≤ 20, -38 ≤ <i>l</i> ≤ 38       |
| Reflections collected                                                                                                                                                                                      | 27833                                                             |
| Independent reflections                                                                                                                                                                                    | 3896 ( <i>R</i> <sub>int</sub> = 0.0519)                          |
| Absorption correction                                                                                                                                                                                      | Semi-empirical from equivalents                                   |
| Max. and min. transmission                                                                                                                                                                                 | 0.7453 and 0.6235                                                 |
| Refinement method                                                                                                                                                                                          | Full-matrix least-squares on <i>F</i> <sup>2</sup>                |
| Data/restraints/parameters                                                                                                                                                                                 | 3896/12/310                                                       |
| Goodness-of-fit on <i>F</i> <sup>2</sup>                                                                                                                                                                   | 1.204                                                             |
| <i>R</i> <sub>1</sub> <sup><i>a</i></sup> , <i>wR</i> <sub>2</sub> <sup><i>b</i></sup> [ <i>I</i> > 2σ( <i>I</i> )]                                                                                        | <i>R</i> <sub>1</sub> = 0.0693, <i>wR</i> <sub>2</sub> = 0.1751   |
| <i>R</i> <sub>1</sub> <sup><i>a</i></sup> , <i>wR</i> <sub>2</sub> <sup><i>b</i></sup> (all data)                                                                                                          | <i>R</i> <sub>1</sub> = 0.0760, <i>wR</i> <sub>2</sub> = 0.1799   |
| Largest diff. peak and hole (e Å <sup>-3</sup> )                                                                                                                                                           | 0.880 and -0.589                                                  |
| <sup><i>a</i></sup> <i>R</i> <sub>1</sub> = $\sum( F_o ) - ( F_c ) / \sum F_o $ <sup><i>b</i></sup> <i>R</i> <sub>2</sub> = $\left[ \frac{\sum \{w(F_o^2 - F_c^2)^2\}}{\sum \{w(F_o^2)^2\}} \right]^{1/2}$ |                                                                   |

**Table S2** Bond lengths (Å) and angles (°) for Zn-CP.

|              |          |
|--------------|----------|
| Zn(1)-O(1)   | 1.928(4) |
| Zn(1)-O(3)#1 | 1.935(3) |
| Zn(1)-N(1)   | 2.026(4) |
| Zn(1)-O(7)   | 2.065(5) |
| C(1)-O(2)    | 1.232(6) |
| C(1)-O(1)    | 1.279(6) |
| C(1)-C(2)    | 1.498(7) |
| C(2)-C(3)    | 1.385(7) |
| C(2)-C(7)    | 1.393(7) |
| C(3)-C(4)    | 1.390(7) |
| C(3)-H(3)    | 0.9300   |
| C(4)-C(5)    | 1.390(7) |
| C(4)-C(9)    | 1.500(7) |
| C(5)-C(6)    | 1.386(7) |
| C(5)-H(5)    | 0.9300   |
| C(6)-C(7)    | 1.386(7) |
| C(6)-C(8)    | 1.494(7) |
| C(7)-H(7)    | 0.9300   |
| C(8)-O(6)    | 1.230(7) |
| C(8)-O(5)    | 1.291(7) |
| C(9)-O(4)    | 1.237(6) |
| C(9)-O(3)    | 1.269(6) |
| C(10)-N(1)   | 1.337(7) |
| C(10)-C(11)  | 1.370(8) |
| C(10)-H(10)  | 0.9300   |
| C(11)-C(12)  | 1.388(8) |
| C(11)-H(11)  | 0.9300   |
| C(12)-C(13)  | 1.395(8) |
| C(12)-C(15)  | 1.486(7) |
| C(13)-C(14)  | 1.366(7) |
| C(13)-H(13)  | 0.9300   |
| C(14)-N(1)   | 1.340(7) |

|                   |            |
|-------------------|------------|
| C(14)-H(14)       | 0.9300     |
| C(15)-C(16)       | 1.365(9)   |
| C(15)-C(19)       | 1.377(8)   |
| C(16)-C(17)       | 1.376(10)  |
| C(16)-H(16)       | 0.9300     |
| C(17)-N(2)        | 1.297(10)  |
| C(17)-H(17)       | 0.9300     |
| C(18)-N(2)        | 1.303(9)   |
| C(18)-C(19)       | 1.376(8)   |
| C(18)-H(18)       | 0.9300     |
| C(19)-H(19)       | 0.9300     |
| N(2)-H(2A)        | 0.86(2)    |
| O(7)-H(7A)        | 0.85(2)    |
| O(7)-H(7B)        | 0.839(19)  |
| O(8)-H(8B)        | 0.85(2)    |
| O(8)-H(8A)        | 0.86(2)    |
| O(9)-H(9A)        | 0.84(2)    |
| O(9)-H(9B)        | 0.85(2)    |
| O(1)-Zn(1)-O(3)#1 | 119.59(15) |
| O(1)-Zn(1)-N(1)   | 127.79(17) |
| O(3)#1-Zn(1)-N(1) | 103.91(16) |
| O(1)-Zn(1)-O(7)   | 104.39(18) |
| O(3)#1-Zn(1)-O(7) | 98.89(17)  |
| N(1)-Zn(1)-O(7)   | 95.25(19)  |
| O(2)-C(1)-O(1)    | 123.7(5)   |
| O(2)-C(1)-C(2)    | 121.1(4)   |
| O(1)-C(1)-C(2)    | 115.3(4)   |
| C(3)-C(2)-C(7)    | 119.5(5)   |
| C(3)-C(2)-C(1)    | 120.6(4)   |
| C(7)-C(2)-C(1)    | 119.9(4)   |
| C(2)-C(3)-C(4)    | 120.5(4)   |
| C(2)-C(3)-H(3)    | 119.7      |
| C(4)-C(3)-H(3)    | 119.7      |
| C(5)-C(4)-C(3)    | 119.4(4)   |
| C(5)-C(4)-C(9)    | 120.6(4)   |

|                   |          |
|-------------------|----------|
| C(3)-C(4)-C(9)    | 119.8(4) |
| C(6)-C(5)-C(4)    | 120.5(5) |
| C(6)-C(5)-H(5)    | 119.8    |
| C(4)-C(5)-H(5)    | 119.8    |
| C(7)-C(6)-C(5)    | 119.7(5) |
| C(7)-C(6)-C(8)    | 118.7(5) |
| C(5)-C(6)-C(8)    | 121.6(5) |
| C(6)-C(7)-C(2)    | 120.4(5) |
| C(6)-C(7)-H(7)    | 119.8    |
| C(2)-C(7)-H(7)    | 119.8    |
| O(6)-C(8)-O(5)    | 122.3(5) |
| O(6)-C(8)-C(6)    | 121.0(5) |
| O(5)-C(8)-C(6)    | 116.7(5) |
| O(4)-C(9)-O(3)    | 124.4(5) |
| O(4)-C(9)-C(4)    | 120.2(5) |
| O(3)-C(9)-C(4)    | 115.3(4) |
| N(1)-C(10)-C(11)  | 121.9(6) |
| N(1)-C(10)-H(10)  | 119.1    |
| C(11)-C(10)-H(10) | 119.1    |
| C(10)-C(11)-C(12) | 121.0(6) |
| C(10)-C(11)-H(11) | 119.5    |
| C(12)-C(11)-H(11) | 119.5    |
| C(11)-C(12)-C(13) | 116.0(5) |
| C(11)-C(12)-C(15) | 121.1(5) |
| C(13)-C(12)-C(15) | 122.9(5) |
| C(14)-C(13)-C(12) | 120.4(5) |
| C(14)-C(13)-H(13) | 119.8    |
| C(12)-C(13)-H(13) | 119.8    |
| N(1)-C(14)-C(13)  | 122.4(5) |
| N(1)-C(14)-H(14)  | 118.8    |
| C(13)-C(14)-H(14) | 118.8    |
| C(16)-C(15)-C(19) | 116.4(6) |
| C(16)-C(15)-C(12) | 121.1(6) |
| C(19)-C(15)-C(12) | 122.5(5) |
| C(15)-C(16)-C(17) | 119.8(7) |

|                   |          |
|-------------------|----------|
| C(15)-C(16)-H(16) | 120.1    |
| C(17)-C(16)-H(16) | 120.1    |
| N(2)-C(17)-C(16)  | 123.1(7) |
| N(2)-C(17)-H(17)  | 118.4    |
| C(16)-C(17)-H(17) | 118.4    |
| N(2)-C(18)-C(19)  | 122.7(7) |
| N(2)-C(18)-H(18)  | 118.7    |
| C(19)-C(18)-H(18) | 118.7    |
| C(18)-C(19)-C(15) | 119.7(6) |
| C(18)-C(19)-H(19) | 120.1    |
| C(15)-C(19)-H(19) | 120.1    |
| C(10)-N(1)-C(14)  | 118.3(5) |
| C(10)-N(1)-Zn(1)  | 121.4(4) |
| C(14)-N(1)-Zn(1)  | 120.3(4) |
| C(17)-N(2)-C(18)  | 118.3(6) |
| C(17)-N(2)-H(2A)  | 114(5)   |
| C(18)-N(2)-H(2A)  | 128(5)   |
| C(1)-O(1)-Zn(1)   | 117.0(3) |
| C(9)-O(3)-Zn(1)#2 | 120.4(3) |
| Zn(1)-O(7)-H(7A)  | 103(5)   |
| Zn(1)-O(7)-H(7B)  | 112(5)   |
| H(7A)-O(7)-H(7B)  | 109(3)   |
| H(8B)-O(8)-H(8A)  | 108(4)   |
| H(9A)-O(9)-H(9B)  | 111(4)   |

---

Symmetry transformations used to generate equivalent atoms:

#1  $x-1/2, y+1/2, z$  #2  $x+1/2, y-1/2, z$

**Table S3** Selected hydrogen bond distances (Å) and angles (°) for Zn-coordination polymer (Zn-CP)

| D–H···A type      | D–H (Å) | H···A (Å) | D–H···A (Å) | D–H···A (°) |
|-------------------|---------|-----------|-------------|-------------|
| O(7)–H(7A)···O(2) | 0.852   | 1.839     | 2.691       | 166.3       |
| O(7)–H(7b)···O(9) | 0.841   | 1.87      | 2.711       | 166.2       |
| N(2)–H(2A)···O(5) | 0.867   | 1.71      | 2.577       | 173.7       |

D = Donor, A = Acceptor

**Table S4** Comparison of supercapacitor performance of Zn-CP/rGO with previously reported MOFs/CPs and related composites.

| Material                                                                                                  | Linkers used                  | Synthesis conditions | $C_s$ (F/g) | Rate                  | Electrolyte                                                            | $C_s$ retention         | Ref. |
|-----------------------------------------------------------------------------------------------------------|-------------------------------|----------------------|-------------|-----------------------|------------------------------------------------------------------------|-------------------------|------|
| [Co(H <sub>2</sub> O) <sub>2</sub> (Fc(PHOO) <sub>2</sub> ) <sub>2</sub> ·2H <sub>2</sub> O] <sub>n</sub> | Ferrocene and phosphonic acid | RT                   | 2517        | 2 A g <sup>-1</sup>   | 1 M t-Bu <sub>3</sub> PC <sub>10</sub> H <sub>25</sub> BF <sub>4</sub> | 90% after 1000 cycles   | [22] |
| Cu-Asp                                                                                                    | L-Aspartic acid               | RT                   | 367         | 0.6 A g <sup>-1</sup> | 2 M KOH                                                                | 94% after 1000 cycles   | [29] |
| CoNi-MOF                                                                                                  | H <sub>2</sub> BDC            | 120 °C (12 h)        | 1044        | 2 A g <sup>-1</sup>   | 1 M KOH                                                                |                         | [30] |
| Co(II)-TMU-63#<br>30% CoMn <sub>2</sub> O <sub>4</sub><br>NCP                                             | H <sub>2</sub> tpa and dapz   | 105 °C (72 h)        | 1420        | 7 A g <sup>-1</sup>   | 2 M KOH                                                                | 93.3% after 7000 cycles | [31] |
| {[Co(Hmt)(tfbdc)(H <sub>2</sub> O) <sub>2</sub> ]·(H <sub>2</sub> O) <sub>2</sub> ] <sub>n</sub> }        | HMT and H <sub>2</sub> tfbdc  | Volatilized at RT    | 2474        | 1 A g <sup>-1</sup>   | 1 M KOH                                                                | 94.3% after 2000 cycles | [32] |
| Ni <sub>33</sub> /ZIF-67/rGO <sub>20</sub>                                                                | 2-MeIm                        | RT                   | 304         | 1 A g <sup>-1</sup>   | 1 M H <sub>2</sub> SO <sub>4</sub>                                     | 99% after 1000 cycles   | [33] |
| rGO/Zn-MOF@PANI                                                                                           | H <sub>2</sub> BDC            | 160 °C (5 h)         | 372         | 0.1 A g <sup>-1</sup> | 1 M H <sub>2</sub> SO <sub>4</sub>                                     |                         | [34] |

|                            |                                 |                                           |       |                        |                                                                                   |                          |           |
|----------------------------|---------------------------------|-------------------------------------------|-------|------------------------|-----------------------------------------------------------------------------------|--------------------------|-----------|
| Ce-MOF/CNT                 | H <sub>3</sub> BTC              | Ultrasonication, RT                       | 129.6 | 1 A g <sup>-1</sup>    | 1 M KOH                                                                           | 85% after 5000 cycles    | [35]      |
| Ce-MOF/GO                  | H <sub>3</sub> BTC              | Ultrasonication, RT                       | 233.8 | 1 A g <sup>-1</sup>    | 1 M KOH                                                                           | 86% after 5000 cycles    | [35]      |
| Cu- MOF/rGO                | H <sub>4</sub> L                | Ultrasonication, RT                       | 462   | 0.8 A g <sup>-1</sup>  | 1 M Na <sub>2</sub> SO <sub>4</sub>                                               | 93.7% after 1000 cycles  | [37]      |
| Zn/Ni-MOF (MOF-2)          | H <sub>2</sub> BDC              | 100 °C (8 h)                              | 1620  | 0.25 A g <sup>-1</sup> | 6 M KOH                                                                           | 91% after 3000 cycles    | [52]      |
| GA/MOF (Fe <sup>3+</sup> ) | H <sub>2</sub> BDC              | Hydrothermal                              | 389   | 0.5 A g <sup>-1</sup>  | 1 M H <sub>2</sub> SO <sub>4</sub>                                                | 74.4% after 10000 cycles | [53]      |
| CNTs@Mn-MOF                | H <sub>2</sub> BDC              | Hydrothermal                              | 203.1 | 1 A g <sup>-1</sup>    | 1 M Na <sub>2</sub> SO <sub>4</sub>                                               |                          | [58]      |
| ZIF-67/rGO                 | 2-MeIm                          | Stirring, RT                              | 562   | 5 mV s <sup>-1</sup>   | 1 M Na <sub>2</sub> SO <sub>4</sub> + 0.2 M K <sub>3</sub> [Fe(CN) <sub>6</sub> ] | 90% after 1000 cycles    | [60]      |
| rGO-HKAUST-1               | H <sub>3</sub> BTC              | Hydrothermal                              | 385   | 1 A g <sup>-1</sup>    | 0.5 M Na <sub>2</sub> SO <sub>4</sub>                                             |                          | [S1]      |
| ZIF-67                     | 2-MeIm                          | Stirring, RT                              | 188.7 | 1 A g <sup>-1</sup>    | 1 M KOH                                                                           | 105% after 3000 cycles   | [S2]      |
| POAP/Cu-bipy-BTC           | 2,2'-bpy and H <sub>3</sub> BDC | Hydrothermal-electropolymerization        | 422   | 1 mA                   | 0.1 M HClO <sub>4</sub>                                                           | 93% after 1000 cycles    | [S3]      |
| Carbonized Zn-MOF/PANI     | 8-hydroxyquinoline              | in situ chemical oxidative polymerization | 477   | 1 A g <sup>-1</sup>    | 1 M H <sub>2</sub> SO <sub>4</sub>                                                |                          | [S4]      |
| Co-MOF                     | FcDCA and 4,4'-bpy              | Ultrasonication, RT                       | 446.8 | 1.2 A g <sup>-1</sup>  | 1 M KOH                                                                           | 88.3% after 8000 cycles  | [S5]      |
| Na/Co-MOF                  | 4,4'-Azpye and 2,5'-TDCA        | Ultrasonication, RT                       | 321.8 | 4 A g <sup>-1</sup>    | 0.5 M Na <sub>2</sub> SO <sub>4</sub>                                             | 97.4% after 5000 cycles  | [S6]      |
| Zn-CP/rGO                  | 4,4'-bpy and 1,3,5-BTC          | Ultrasonication, RT                       | 377   | 1 A g <sup>-1</sup>    | 2 M KOH                                                                           | 85% after 6000 cycles    | This work |



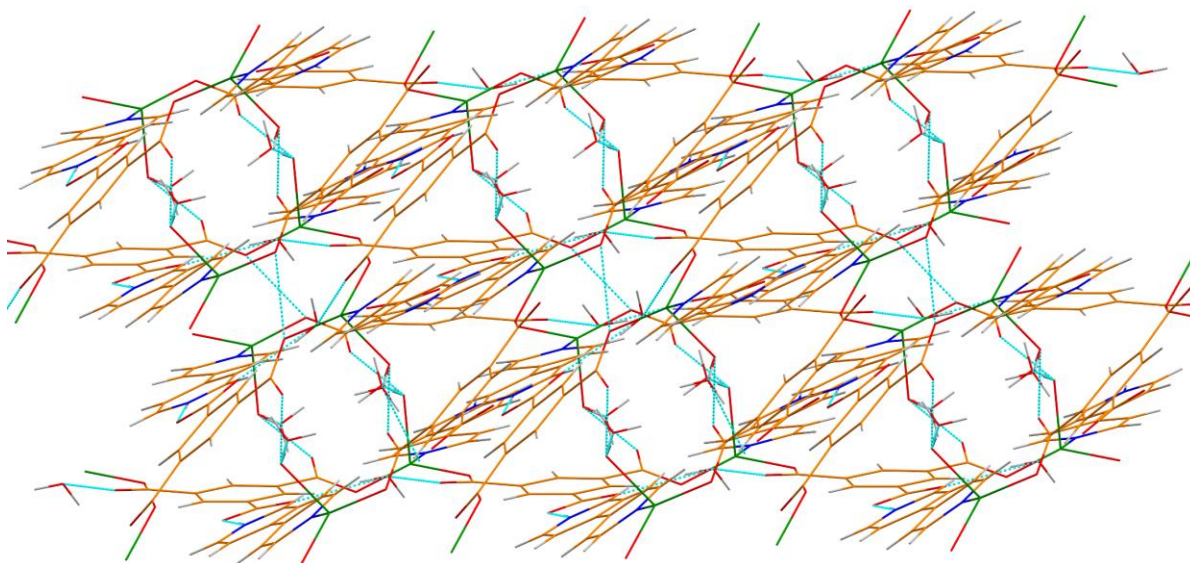

**Fig. S1** 3D wireframe structure of Zn-coordination polymer (Zn-CP).

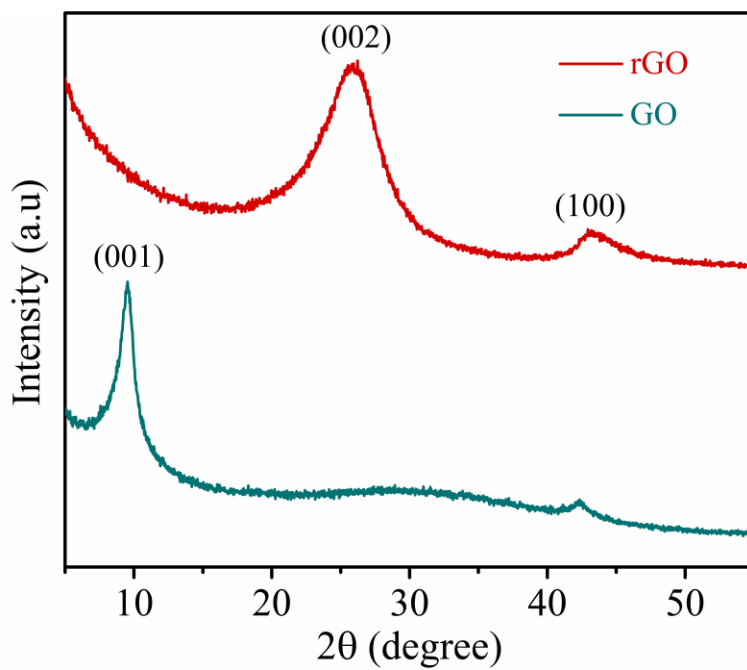

**Fig. S2** Powder X-ray diffraction pattern of GO and rGO.

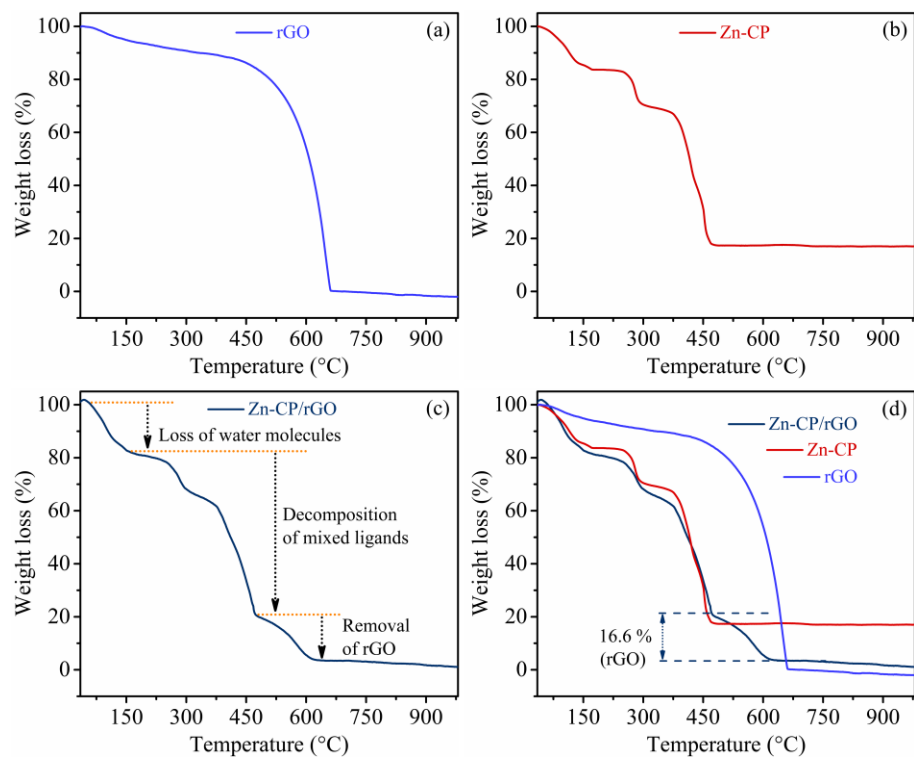

**Fig. S3** TGA curves of (a) rGO, (b) Zn-CP, (c) Zn-CP/rGO and (d) comparative TGA.

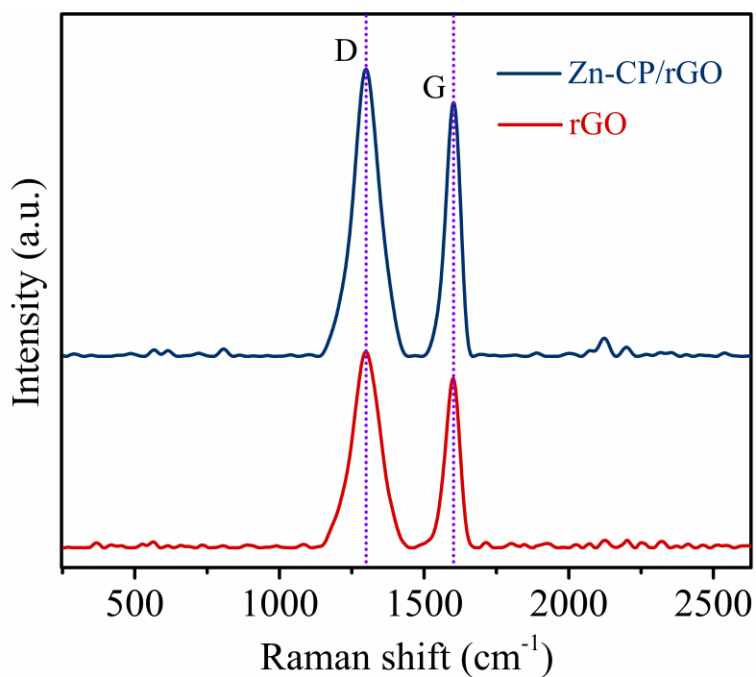

**Fig. S4** Raman spectra of rGO and Zn-CP/rGO.

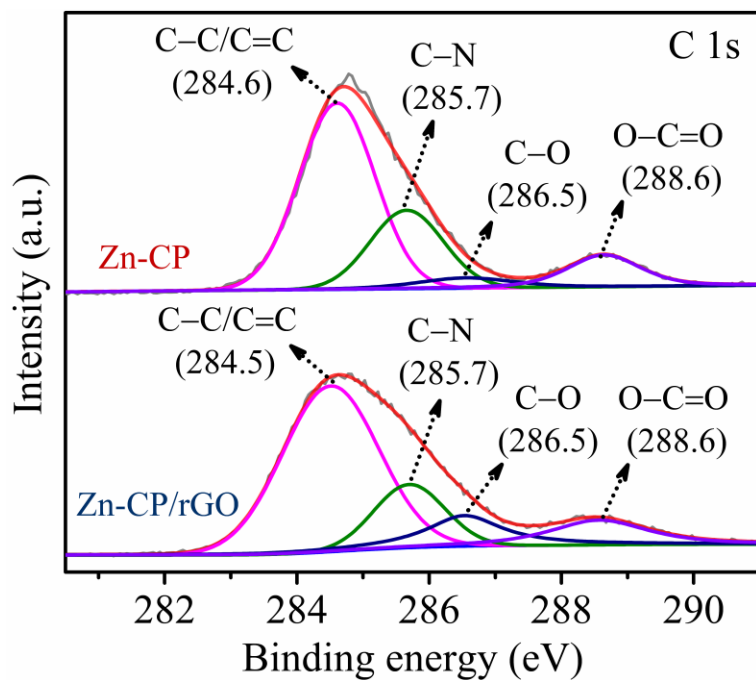

**Fig. S5** High resolution deconvoluted C1s spectra of Zn-CP and Zn-CP/rGO samples.

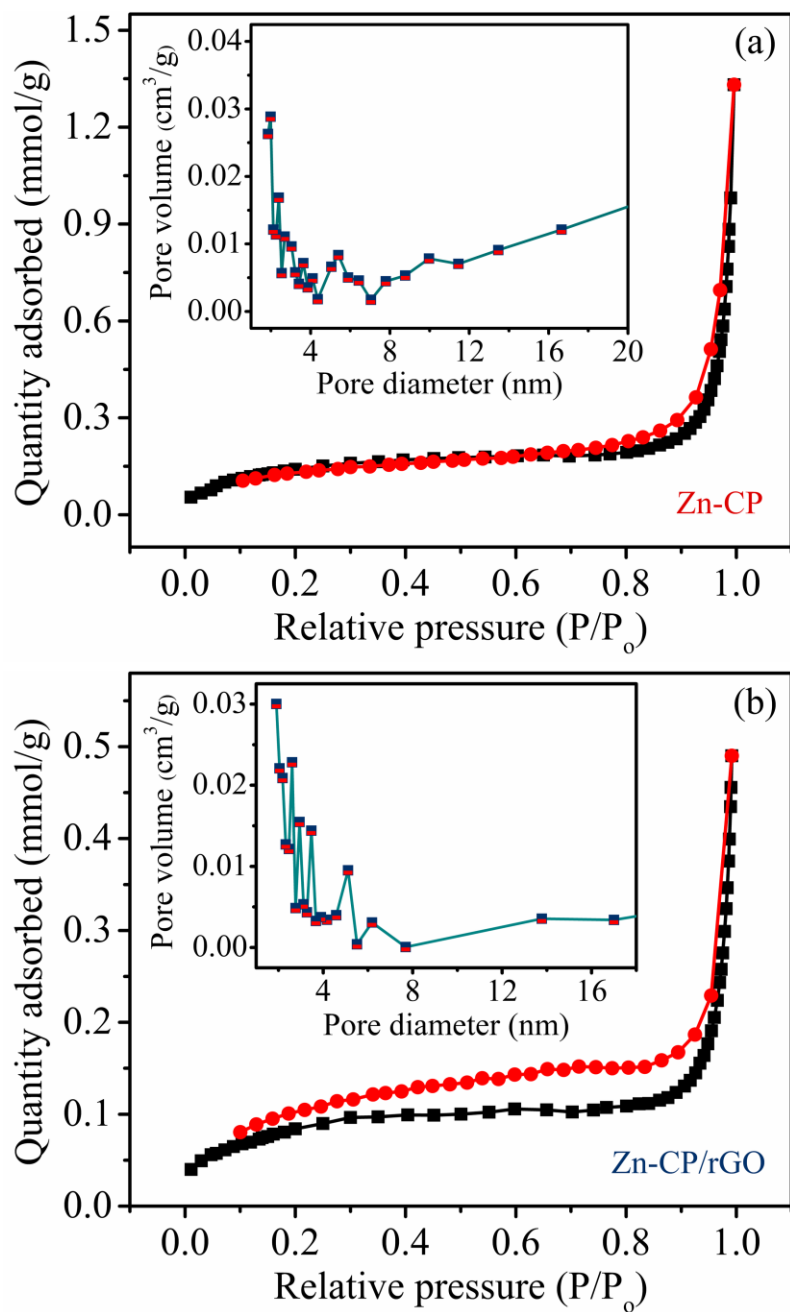

**Fig. S6** N<sub>2</sub> adsorption-desorption isotherm of (a) Zn-CP and (b) Zn-CP/rGO (inset: BJH pore size distribution curves).

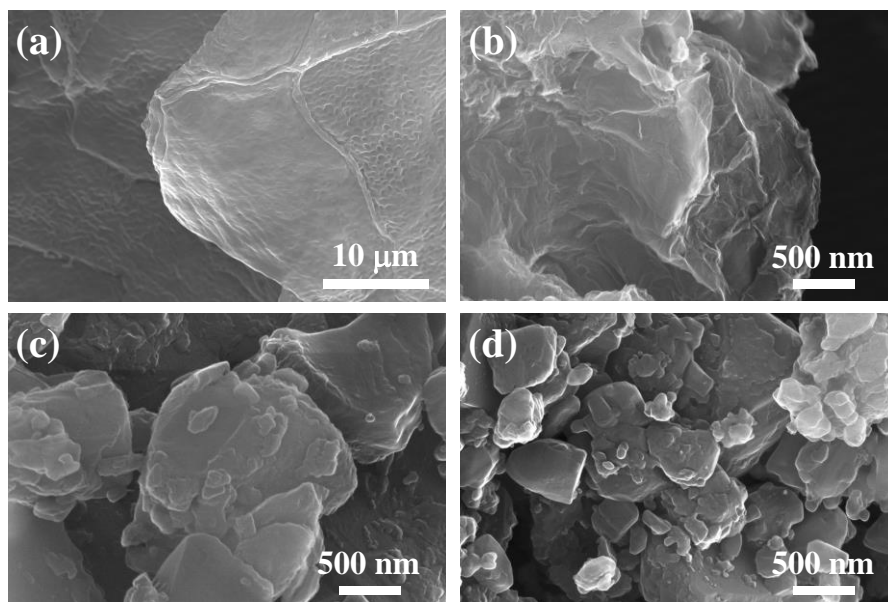

**Fig. S7** FESEM images of (a, b) rGO, (c) Zn-CP and (d) Zn-CP/rGO.

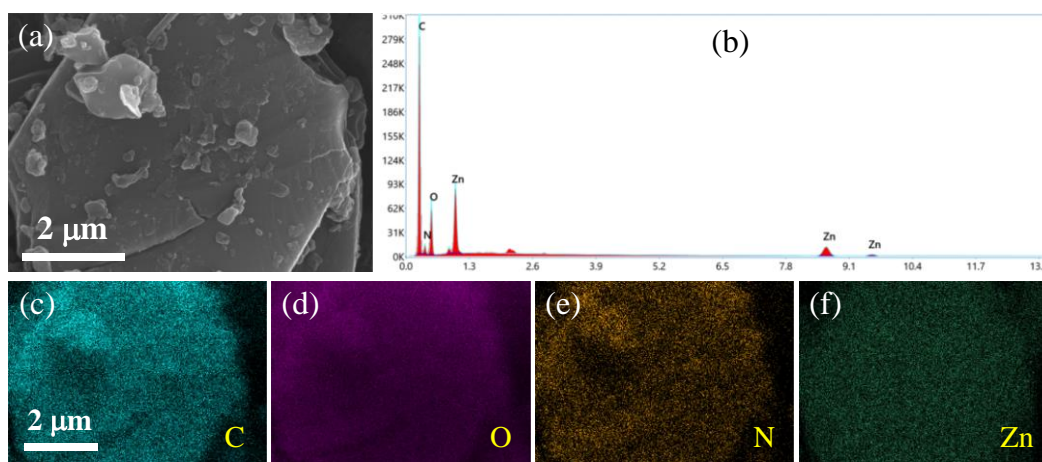

**Fig. S8** (a) FESEM image from which elemental mapping was taken, (b) EDS measurement of Zn-CP showing different elements and (c-f) elemental mapping of Zn-CP.

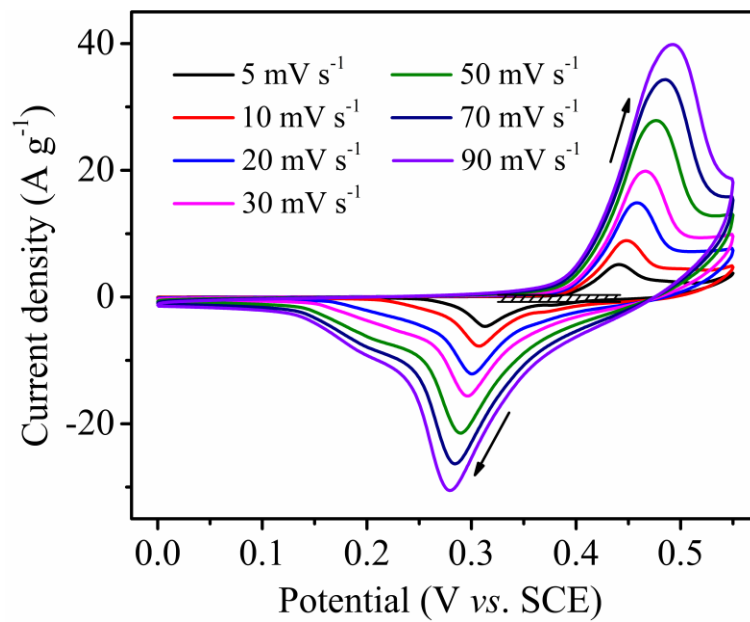

**Fig. S9** CV profile of Zn-CP electrode measured at different scan rates.

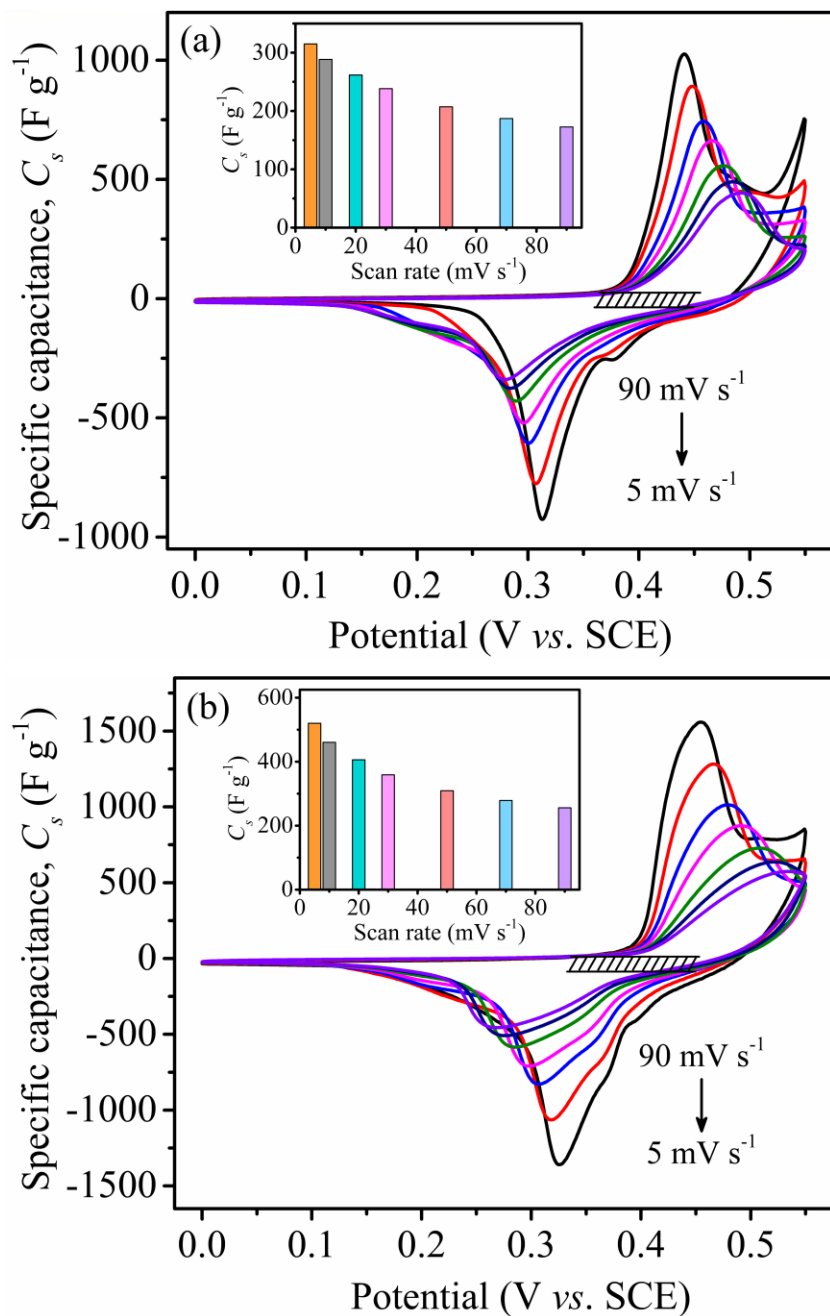

**Fig. S10** Plot of specific capacitance vs applied potentials at different scan rates for (a) Zn-CP, and (b) Zn-CP/rGO electrodes; Inset shows the specific capacitance vs scan rate graph.

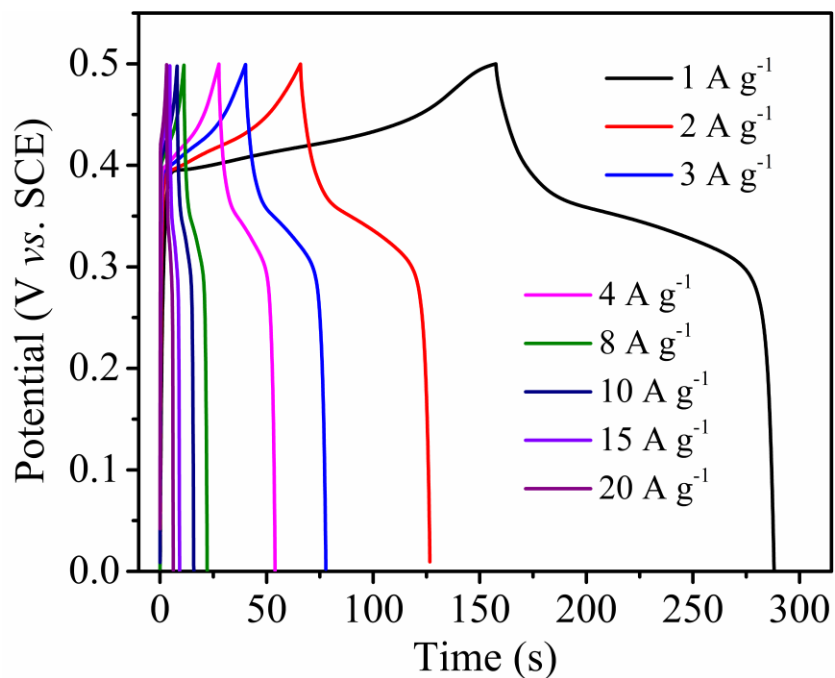

**Fig. S11** GCD profile of Zn-CP electrode measured at different current densities.

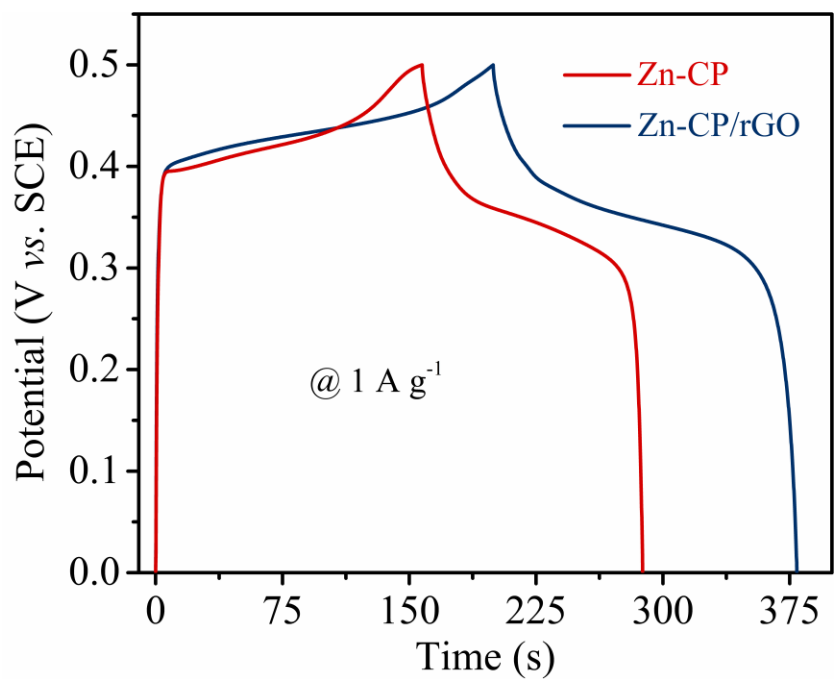

**Fig. S12** Comparison of GCD profiles between Zn-CP and Zn-CP/rGO electrodes measured at a current density of 1 A g<sup>-1</sup>.



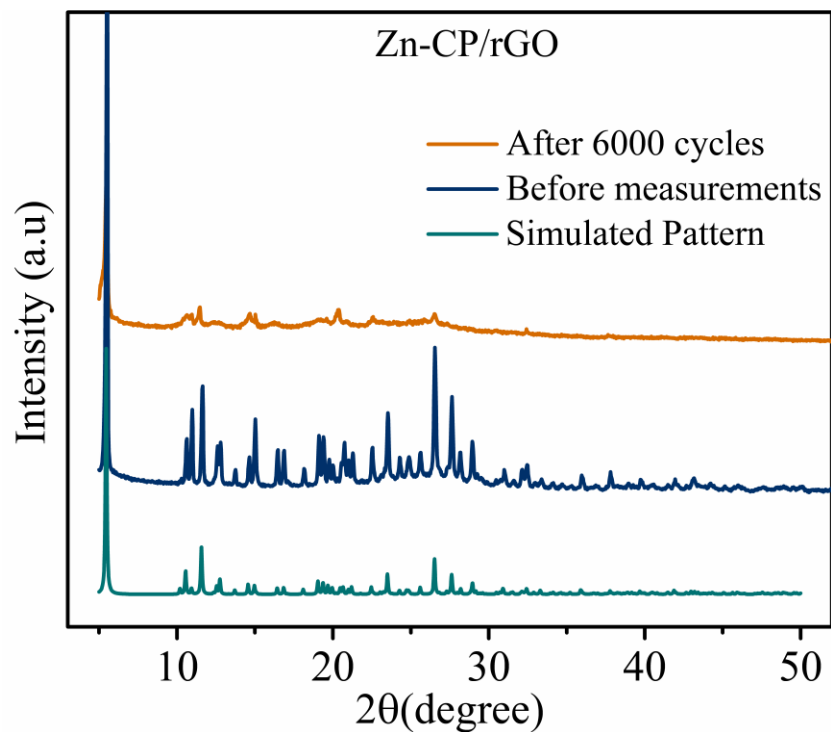

**Fig. S13** The comparative PXRD pattern of Zn-CP/rGO electrode before and after cyclic measurements.

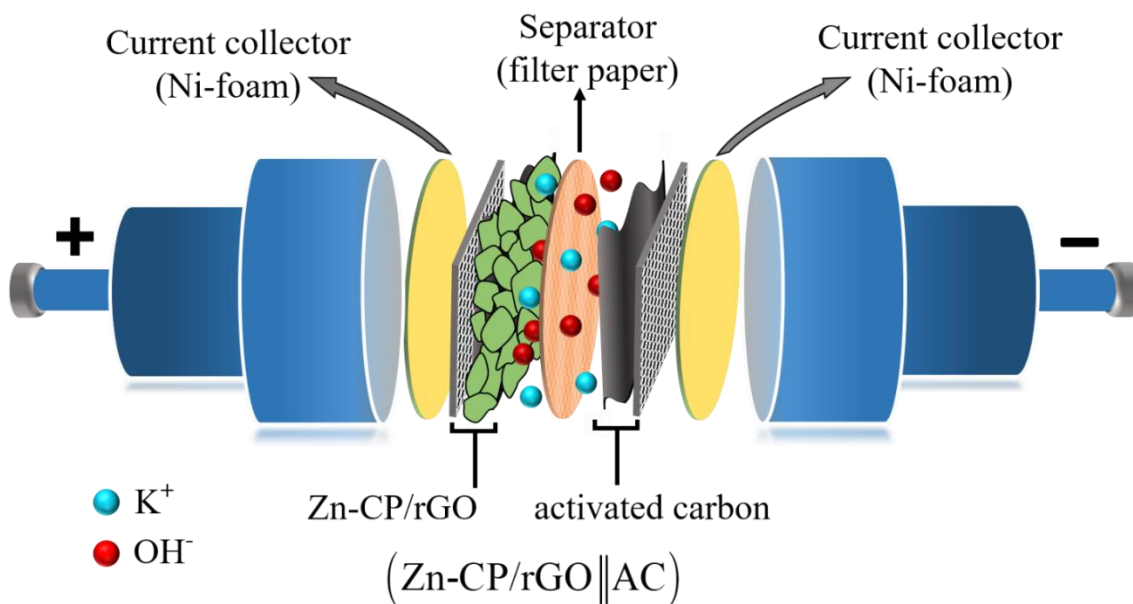

**Fig. S14** Schematic representation of the hybrid supercapattery (HSC) device  $Zn-CP/rGO \parallel AC$  assembled in a Swagelok cell using Zn-CP/rGO as positive and AC as negative electrodes.

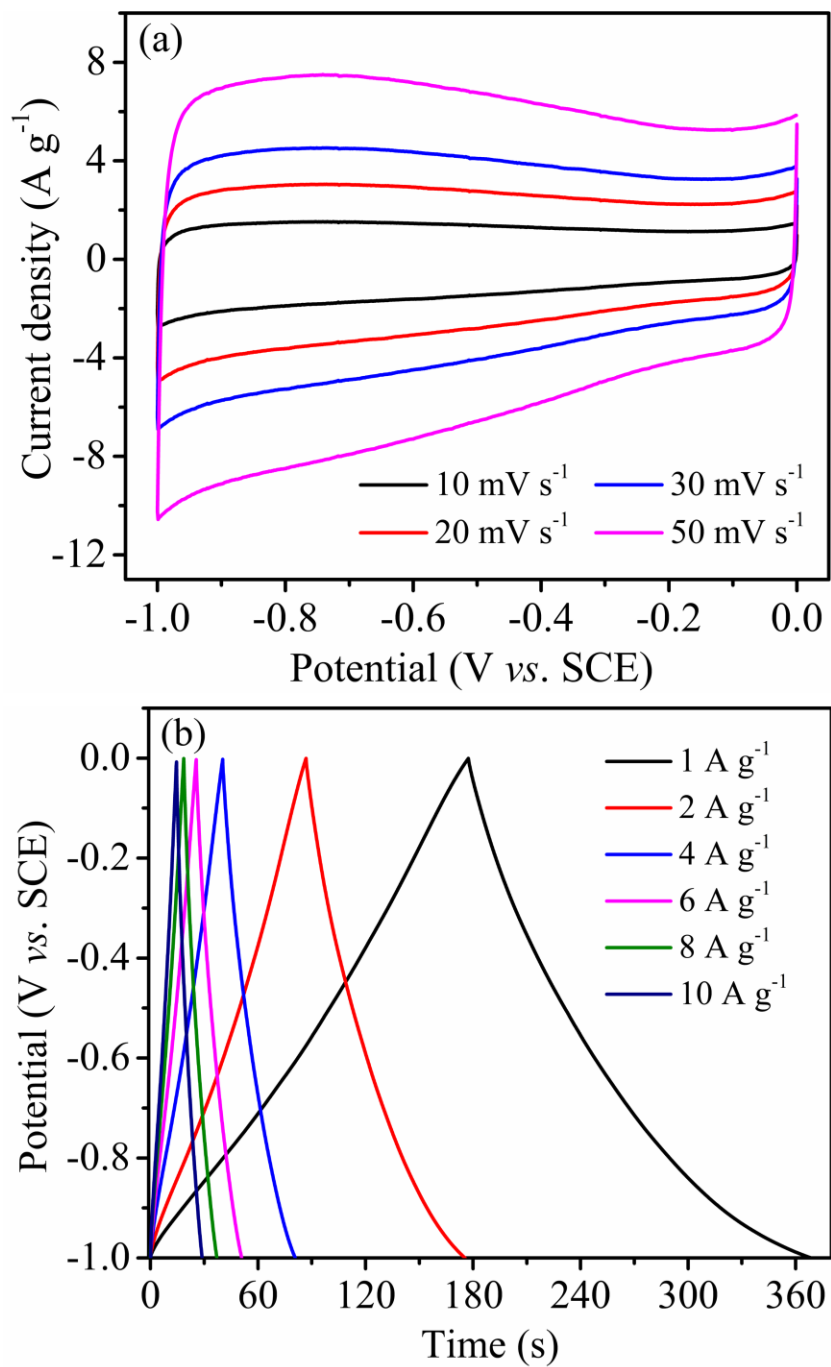

**Fig. S15** (a) CV profile at different scan rates, and (b) GCD profile at different current densities of activated carbon (AC) measured using 2 M KOH electrolyte.

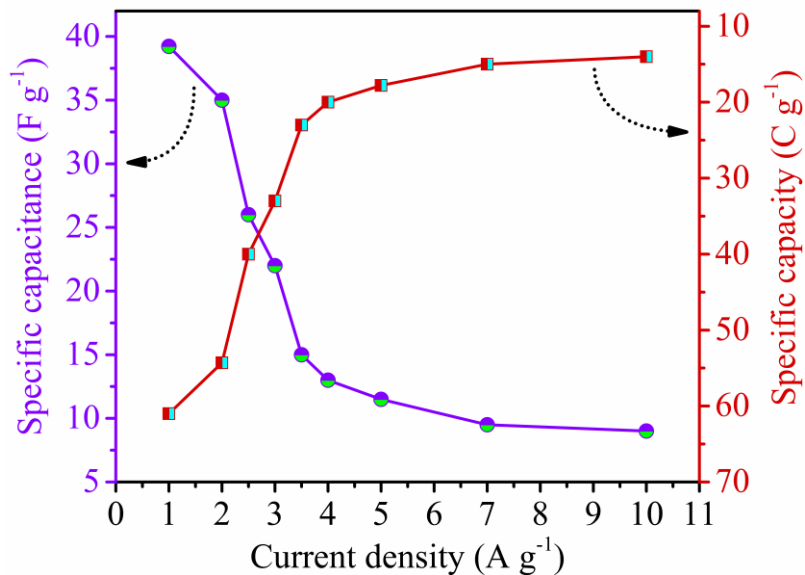

**Fig. S16** Plot of specific capacitance and specific capacity vs current density of Zn-CP/rGO||AC HSC device.

## References

- (1) P. Srimuk, S. Luanwuthi, A. Kittayavathananon and M. Sawangphruk, *Electrochim. Acta*, 2015, **157**, 69–77.
- (2) D. Zhang, H. Shi, R. Zhang, Z. Zhang, N. Wang, J. Li, B. Yuan, H. Bai and J. Zhang, *RSC Adv.*, 2015, **5**, 58772–58776.
- (3) A. Ehsani, J. Khodayari, M. Hadi, H. M. Shiri and H. Mostanzadeh, *Ionics*, 2017, **23**, 131–138.
- (4) S. N. Guo, Y. Zhu, Y. Y. Yan, Y. Min, J. Fan, Q. Xu and H. Yun, *J. Power Sources*, 2016, **316**, 176–182.
- (5) R. Rajak, M. Saraf, A. Mohammad and S. M. Mobin, *J. Mater. Chem. A*, 2017, **5**, 17998–18011.
- (6) R. Rajak, M. Saraf and S. M. Mobin, *Inorg. Chem.*, 2020, **59**, 1642–1652.
